# Supplementary material for: Flexible Janus nanofibers: a feasible route to realize simultaneously tuned magnetism and enhanced color-tunable luminescence bifunctionality
Source: Royal Society of Chemistry journal article supplement (doi:10.1039/c5ra01644d), 2015-01-01
Supplement: c5ra01644d1.pdf [file c5ra01644d1.pdf]

## Electronic Supplementary Information (ESI)

### Flexible Janus Nanofiber: a Feasible Route to Realize Simultaneously Tuned Magnetism and Enhanced Color-Tunable Luminescence Bifunctionality

*Xuejiao Zhou, Qianli Ma, Xiangting Dong\*, Jinxian Wang, Wensheng Yu, and Guixia Liu*

*Key Laboratory of Applied Chemistry and Nanotechnology at Universities of Jilin Province, Changchun*

*University of Science and Technology, Changchun 130022. Fax: 86 0431 85383815; Tel: 86 0431*

*85582574; E-mail: dongxiangting888@163.com*

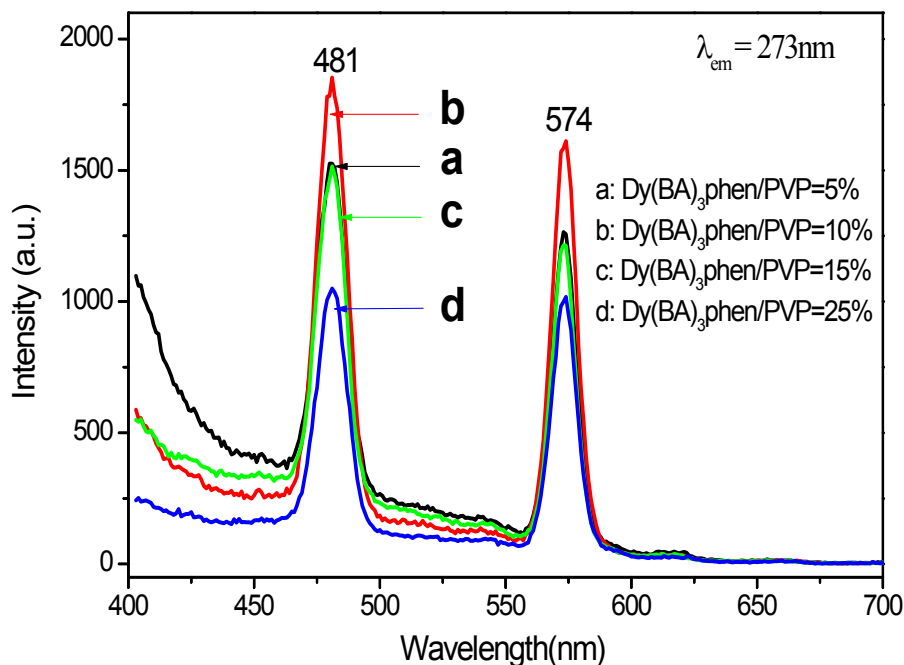

**Figure S1** Emission spectra of Dy(BA)<sub>3</sub>phen/PVP composite nanofibers containing different mass percentage of Dy(BA)<sub>3</sub>phen complex.

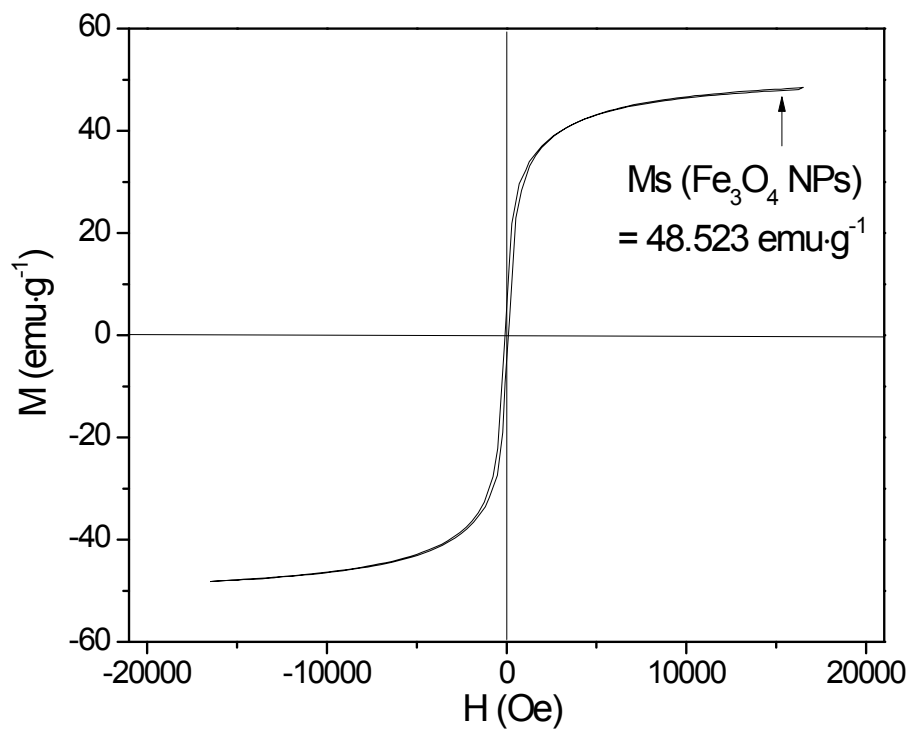

**Figure S2** Hysteresis loop of Fe<sub>3</sub>O<sub>4</sub> NPs.
